# Supplementary material for: Evaluation of Dimebon in cellular model of Huntington's disease
Source: PubMed Central journal article supplement (PMC2577671; doi:10.1186/1750-1326-3-15), 2008-10-21
Supplement: 1750-1326-3-15-S1.pdf [file 1750-1326-3-15-S1.pdf]

<sup>1</sup>H NMR (500 MHz, DMSO-*d*<sub>6</sub>) δ ppm 11.51 (br. s., 1 H) 8.57 (d, *J*=1.58 Hz, 1 H) 8.24 (dd, *J*=8.20, 1.89 Hz, 1 H) 7.76 (d, *J*=8.20 Hz, 1 H) 7.36 (d, *J*=8.20 Hz, 1 H) 7.19 (s, 1 H) 6.90 - 7.00 (m, 1 H) 4.48 (d, *J*=12.30 Hz, 1 H) 4.39 (t, *J*=7.09 Hz, 2 H) 4.21 (dd, *J*=14.03, 7.72 Hz, 1 H) 3.68 (d, *J*=11.03 Hz, 1 H) 3.35 - 3.45 (m, 1 H) 3.13 (td, *J*=13.79, 6.78 Hz, 2 H) 3.03 (m, 2 H) 2.91 (d, *J*=4.41 Hz, 3 H) 2.68 (s, 3 H) 2.36 (s, 3 H)

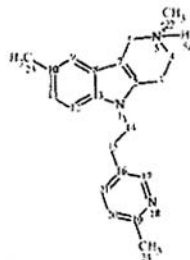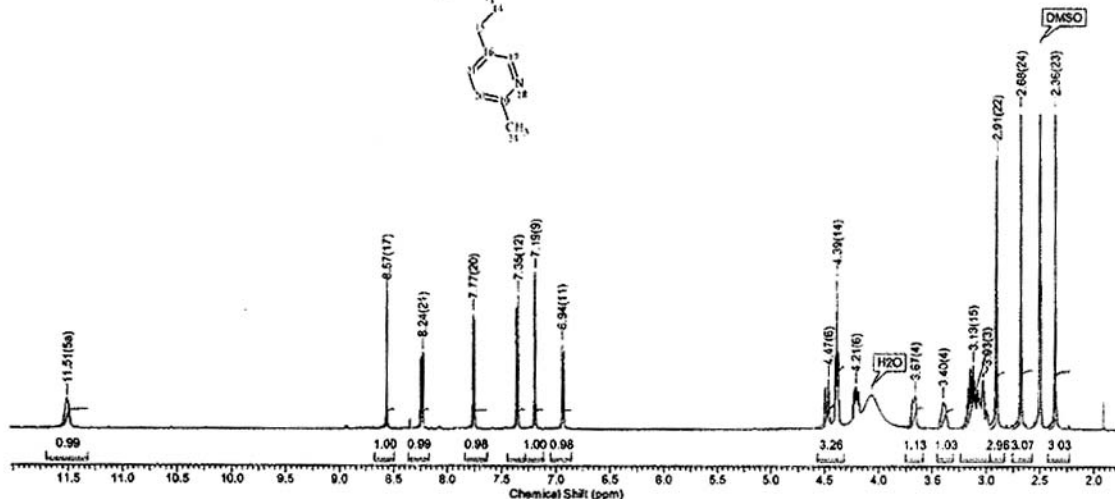

**Figure 1. Proton spectrum in DMSO**
