# Supplementary material for: Evaluation of Dimebon in cellular model of Huntington's disease
Source: PubMed Central journal article supplement (PMC2577671; doi:10.1186/1750-1326-3-15), 2008-10-21
Supplement: 1750-1326-3-15-S3.pdf [file 1750-1326-3-15-S3.pdf]

## EXPERIMENTAL RESULTS - BIOCHEMICAL ASSAYS

| Cat. #   | TARGET                                     | BATCH* | SPP. | n= | CONC. | †% INHIBITION |      |     |   |    | IC <sub>50</sub> | K <sub>i</sub> | n <sub>H</sub> | R |
|----------|--------------------------------------------|--------|------|----|-------|---------------|------|-----|---|----|------------------|----------------|----------------|---|
|          |                                            |        |      |    |       | %             | -100 | -50 | 0 | 50 |                  |                |                |   |
| 118050   | CYP450, 1A2                                | 232511 | hum  | 2  | 10 µM | 5             |      |     |   |    |                  |                |                |   |
| ◆ 118070 | CYP450, 2C19                               | 232613 | hum  | 2  | 10 µM | 55            |      |     |   |    |                  |                |                |   |
| 118060   | CYP450, 2C9                                | 232612 | hum  | 2  | 10 µM | 2             |      |     |   |    |                  |                |                |   |
| 118080   | CYP450, 2D6                                | 232614 | hum  | 2  | 10 µM | 16            |      |     |   |    |                  |                |                |   |
| 118090   | CYP450, 3A4                                | 232615 | hum  | 2  | 10 µM | 22            |      |     |   |    |                  |                |                |   |
| 140010   | Monoamine Oxidase MAO-A                    | 232466 | hum  | 2  | 10 µM | 6             |      |     |   |    |                  |                |                |   |
| 140120   | Monoamine Oxidase MAO-B                    | 232467 | hum  | 2  | 10 µM | 5             |      |     |   |    |                  |                |                |   |
| 164700   | Peptidase, BACE1 (β-Secretase)             | 232778 | hum  | 2  | 10 µM | -9            |      |     |   |    |                  |                |                |   |
| 200510   | Adenosine A <sub>1</sub>                   | 232649 | hum  | 2  | 10 µM | 0             |      |     |   |    |                  |                |                |   |
| 200610   | Adenosine A <sub>2A</sub>                  | 232650 | hum  | 2  | 10 µM | -3            |      |     |   |    |                  |                |                |   |
| 200720   | Adenosine A <sub>3</sub>                   | 232555 | hum  | 2  | 10 µM | 6             |      |     |   |    |                  |                |                |   |
| ◆ 203100 | Adrenergic α <sub>1A</sub>                 | 232528 | rat  | 2  | 10 µM | 96            |      |     |   |    |                  |                |                |   |
| ◆ 203200 | Adrenergic α <sub>1B</sub>                 | 232529 | rat  | 2  | 10 µM | 100           |      |     |   |    |                  |                |                |   |
| ◆ 203400 | Adrenergic α <sub>1D</sub>                 | 232530 | hum  | 2  | 10 µM | 95            |      |     |   |    |                  |                |                |   |
| ◆ 203620 | Adrenergic α <sub>2A</sub>                 | 232534 | hum  | 2  | 10 µM | 97            |      |     |   |    |                  |                |                |   |
| 204010   | Adrenergic β <sub>1</sub>                  | 232625 | hum  | 2  | 10 µM | -7            |      |     |   |    |                  |                |                |   |
| 204110   | Adrenergic β <sub>2</sub>                  | 232626 | hum  | 2  | 10 µM | 14            |      |     |   |    |                  |                |                |   |
| 212510   | Bradykinin B <sub>1</sub>                  | 232432 | hum  | 2  | 10 µM | -9            |      |     |   |    |                  |                |                |   |
| 212610   | Bradykinin B <sub>2</sub>                  | 232430 | hum  | 2  | 10 µM | -2            |      |     |   |    |                  |                |                |   |
| ◆ 214510 | Calcium Channel L-Type, Benzothiazepine    | 232556 | rat  | 2  | 10 µM | 52            |      |     |   |    |                  |                |                |   |
| 214600   | Calcium Channel L-Type, Dihydropyridine    | 232557 | rat  | 2  | 10 µM | -12           |      |     |   |    |                  |                |                |   |
| 216000   | Calcium Channel N-Type                     | 232558 | rat  | 2  | 10 µM | 0             |      |     |   |    |                  |                |                |   |
| ◆ 219500 | Dopamine D <sub>1</sub>                    | 232544 | hum  | 2  | 10 µM | 70            |      |     |   |    |                  |                |                |   |
| ◆ 219700 | Dopamine D <sub>2S</sub>                   | 232546 | hum  | 2  | 10 µM | 83            |      |     |   |    |                  |                |                |   |
| ◆ 219800 | Dopamine D <sub>3</sub>                    | 232547 | hum  | 2  | 10 µM | 73            |      |     |   |    |                  |                |                |   |
| ◆ 219900 | Dopamine D <sub>4,2</sub>                  | 232548 | hum  | 2  | 10 µM | 52            |      |     |   |    |                  |                |                |   |
| 225510   | Epidermal Growth Factor (EGF)              | 232449 | hum  | 2  | 10 µM | 1             |      |     |   |    |                  |                |                |   |
| 226300   | G Protein-Coupled Receptor GPR103          | 232731 | hum  | 2  | 10 µM | 4             |      |     |   |    |                  |                |                |   |
| 226600   | GABA <sub>A</sub> , Flunitrazepam, Central | 232692 | rat  | 2  | 10 µM | 18            |      |     |   |    |                  |                |                |   |
| 226500   | GABA <sub>A</sub> , Muscimol, Central      | 232691 | rat  | 2  | 10 µM | 6             |      |     |   |    |                  |                |                |   |
| 228610   | GABA <sub>B1A</sub>                        | 232480 | hum  | 2  | 10 µM | -10           |      |     |   |    |                  |                |                |   |

\* Batch: Represents compounds tested concurrently in the same assay(s). ‡ Partially soluble in *in vitro* test solvent.

◆ Denotes item meeting criteria for significance

† Results with ≥ 50% stimulation or inhibition are highlighted.

R=Additional Comments

gp=guinea pig; ham=hamster; hum=human

## EXPERIMENTAL RESULTS - BIOCHEMICAL ASSAYS

| Cat. #   | TARGET                                                            | BATCH* | SPP.   | n= | CONC. | †% INHIBITION |      |     |   |    | IC <sub>50</sub> | K <sub>i</sub> | n <sub>H</sub> | R |
|----------|-------------------------------------------------------------------|--------|--------|----|-------|---------------|------|-----|---|----|------------------|----------------|----------------|---|
|          |                                                                   |        |        |    |       | %             | -100 | -50 | 0 | 50 |                  |                |                |   |
| 232020   | Glucocorticoid                                                    | 232623 | hum    | 2  | 10 µM | 3             |      |     |   |    |                  |                |                |   |
| 232700   | Glutamate, Kainate                                                | 232436 | rat    | 2  | 10 µM | 7             |      |     |   |    |                  |                |                |   |
| 232810   | Glutamate, NMDA, Agonism                                          | 232437 | rat    | 2  | 10 µM | 10            |      |     |   |    |                  |                |                |   |
| 232910   | Glutamate, NMDA, Glycine                                          | 232656 | rat    | 2  | 10 µM | 11            |      |     |   |    |                  |                |                |   |
| 233000   | Glutamate, NMDA, Phencyclidine                                    | 232657 | rat    | 2  | 10 µM | -5            |      |     |   |    |                  |                |                |   |
| ◆ 239610 | Histamine H <sub>1</sub>                                          | 232563 | hum    | 2  | 10 µM | 101           |      |     |   |    |                  |                |                |   |
| ◆ 239710 | Histamine H <sub>2</sub>                                          | 232599 | hum    | 2  | 10 µM | 96            |      |     |   |    |                  |                |                |   |
| 239810   | Histamine H <sub>3</sub>                                          | 232701 | hum    | 2  | 10 µM | -4            |      |     |   |    |                  |                |                |   |
| ◆ 241000 | Imidazoline I <sub>2</sub> , Central                              | 232443 | rat    | 2  | 10 µM | 89            |      |     |   |    |                  |                |                |   |
| 251600   | Melatonin MT <sub>1</sub>                                         | 232495 | hum    | 2  | 10 µM | 3             |      |     |   |    |                  |                |                |   |
| 252610   | Muscarinic M <sub>1</sub>                                         | 232550 | hum    | 2  | 10 µM | 9             |      |     |   |    |                  |                |                |   |
| 252710   | Muscarinic M <sub>2</sub>                                         | 232551 | hum    | 2  | 10 µM | 8             |      |     |   |    |                  |                |                |   |
| 252810   | Muscarinic M <sub>3</sub>                                         | 232552 | hum    | 2  | 10 µM | 7             |      |     |   |    |                  |                |                |   |
| 257010   | Neuropeptide Y Y <sub>1</sub>                                     | 233075 | hum    | 2  | 10 µM | 4             |      |     |   |    |                  |                |                |   |
| 257110   | Neuropeptide Y Y <sub>2</sub>                                     | 232773 | hum    | 2  | 10 µM | -5            |      |     |   |    |                  |                |                |   |
| 258590   | Nicotinic Acetylcholine                                           | 232702 | hum    | 2  | 10 µM | 3             |      |     |   |    |                  |                |                |   |
| 258700   | Nicotinic Acetylcholine α1, Bungarotoxin                          | 232444 | hum    | 2  | 10 µM | 1             |      |     |   |    |                  |                |                |   |
| 260110   | Opiate δ (OP1, DOP)                                               | 232688 | hum    | 2  | 10 µM | 0             |      |     |   |    |                  |                |                |   |
| 260210   | Opiate κ (OP2, KOP)                                               | 232559 | hum    | 2  | 10 µM | 16            |      |     |   |    |                  |                |                |   |
| 260410   | Opiate μ (OP3, MOP)                                               | 232560 | hum    | 2  | 10 µM | 10            |      |     |   |    |                  |                |                |   |
| 264500   | Phorbol Ester                                                     | 232774 | mouse  | 2  | 10 µM | 13            |      |     |   |    |                  |                |                |   |
| 265600   | Potassium Channel [K <sub>ATP</sub> ]                             | 232732 | ham    | 2  | 10 µM | -3            |      |     |   |    |                  |                |                |   |
| 265900   | Potassium Channel hERG                                            | 232455 | hum    | 2  | 10 µM | 45            |      |     |   |    |                  |                |                |   |
| 268410   | Prostanoid EP <sub>4</sub>                                        | 232629 | hum    | 2  | 10 µM | 1             |      |     |   |    |                  |                |                |   |
| 268700   | Purinergic P <sub>2X</sub>                                        | 232453 | rabbit | 2  | 10 µM | 5             |      |     |   |    |                  |                |                |   |
| 268810   | Purinergic P <sub>2Y</sub>                                        | 232454 | rat    | 2  | 10 µM | 6             |      |     |   |    |                  |                |                |   |
| 270000   | Rolipram                                                          | 232776 | rat    | 2  | 10 µM | 3             |      |     |   |    |                  |                |                |   |
| ◆ 271000 | Serotonin (5-Hydroxytryptamine) 5-HT <sub>1</sub> , Non-Selective | 232636 | rat    | 2  | 10 µM | 63            |      |     |   |    |                  |                |                |   |
| 271110   | Serotonin (5-Hydroxytryptamine) 5-HT <sub>1A</sub>                | 232637 | hum    | 2  | 10 µM | 22            |      |     |   |    |                  |                |                |   |

\* Batch: Represents compounds tested concurrently in the same assay(s). ‡ Partially soluble in *in vitro* test solvent.

◆ Denotes item meeting criteria for significance

† Results with ≥ 50% stimulation or inhibition are highlighted.

R=Additional Comments

gp=guinea pig; ham=hamster; hum=human

## EXPERIMENTAL RESULTS - BIOCHEMICAL ASSAYS

| Cat. #   | TARGET                                                            | BATCH* | SPP. | n= | CONC. | †% INHIBITION |      |     |   |    | IC <sub>50</sub> | K <sub>i</sub> | n <sub>H</sub> | R |
|----------|-------------------------------------------------------------------|--------|------|----|-------|---------------|------|-----|---|----|------------------|----------------|----------------|---|
|          |                                                                   |        |      |    |       | %             | -100 | -50 | 0 | 50 |                  |                |                |   |
| 271200   | Serotonin (5-Hydroxytryptamine) 5-HT <sub>1B</sub>                | 232638 | rat  | 2  | 10 µM | 48            |      |     |   |    |                  |                |                |   |
| ◆ 271600 | Serotonin (5-Hydroxytryptamine) 5-HT <sub>2</sub> , Non-Selective | 232639 | rat  | 2  | 10 µM | 83            |      |     |   |    |                  |                |                |   |
| ◆ 271700 | Serotonin (5-Hydroxytryptamine) 5-HT <sub>2B</sub>                | 232641 | hum  | 2  | 10 µM | 74            |      |     |   |    |                  |                |                |   |
| ◆ 271800 | Serotonin (5-Hydroxytryptamine) 5-HT <sub>2C</sub>                | 232642 | hum  | 2  | 10 µM | 95            |      |     |   |    |                  |                |                |   |
| 271910   | Serotonin (5-Hydroxytryptamine) 5-HT <sub>3</sub>                 | 232643 | hum  | 2  | 10 µM | -7            |      |     |   |    |                  |                |                |   |
| 272000   | Serotonin (5-Hydroxytryptamine) 5-HT <sub>4</sub>                 | 232644 | gp   | 2  | 10 µM | 17            |      |     |   |    |                  |                |                |   |
| ◆ 272100 | Serotonin (5-Hydroxytryptamine) 5-HT <sub>5A</sub>                | 232645 | hum  | 2  | 10 µM | 99            |      |     |   |    |                  |                |                |   |
| ◆ 272200 | Serotonin (5-Hydroxytryptamine) 5-HT <sub>6</sub>                 | 232646 | hum  | 2  | 10 µM | 101           |      |     |   |    |                  |                |                |   |
| 278110   | Sigma σ <sub>1</sub>                                              | 232456 | hum  | 2  | 10 µM | 28            |      |     |   |    |                  |                |                |   |
| 278200   | Sigma σ <sub>2</sub>                                              | 232457 | rat  | 2  | 10 µM | 22            |      |     |   |    |                  |                |                |   |
| 279510   | Sodium Channel, Site 2                                            | 232447 | rat  | 2  | 10 µM | 37            |      |     |   |    |                  |                |                |   |
| 255510   | Tachykinin NK <sub>1</sub>                                        | 232458 | hum  | 2  | 10 µM | 20            |      |     |   |    |                  |                |                |   |
| 220320   | Transporter, Dopamine (DAT)                                       | 232532 | hum  | 2  | 10 µM | 13            |      |     |   |    |                  |                |                |   |
| 226400   | Transporter, GABA                                                 | 232433 | rat  | 2  | 10 µM | -26           |      |     |   |    |                  |                |                |   |
| 204410   | Transporter, Norepinephrine (NET)                                 | 232531 | hum  | 2  | 10 µM | 20            |      |     |   |    |                  |                |                |   |
| 274030   | Transporter, Serotonin (5-Hydroxytryptamine) (SERT)               | 232533 | hum  | 2  | 10 µM | -7            |      |     |   |    |                  |                |                |   |

\* Batch: Represents compounds tested concurrently in the same assay(s). ‡ Partially soluble in *in vitro* test solvent.

◆ Denotes item meeting criteria for significance

† Results with ≥ 50% stimulation or inhibition are highlighted.

R=Additional Comments

gp=guinea pig; ham=hamster; hum=human
